# Supplementary material
Source: Springer Nature journal article supplement (https://www.springermedizin.de/resource/supplementary/13601_2014_1070_MOESM3_ESM.pdf/9678638)

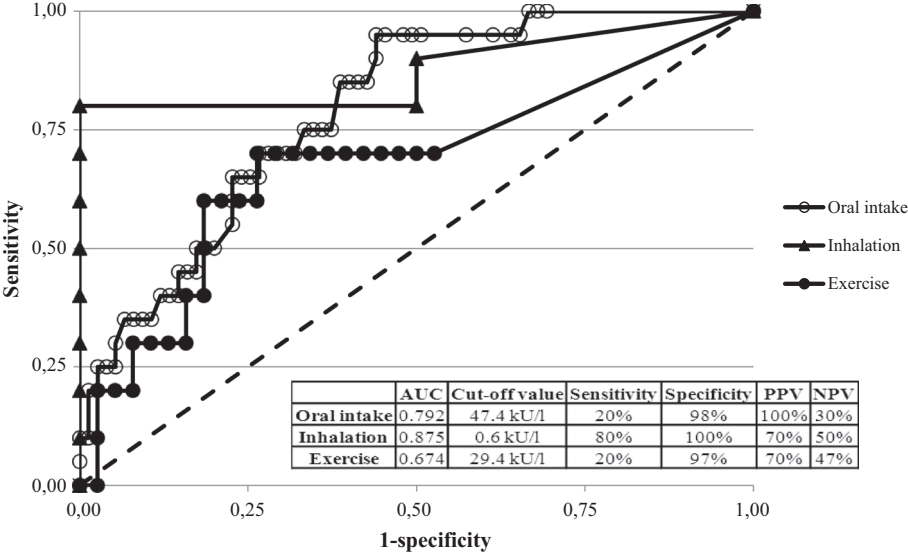

Supplement: MOESM3 [file 9678638]
